# Supplementary material for: One-step hydrothermal synthesis of hydrophilic Fe3O4/carbon composites and their application in removing toxic chemicals
Source: Royal Society of Chemistry journal article supplement (doi:10.1039/c6ra01408a), 2016-01-01
Supplement: c6ra01408a1.pdf [file c6ra01408a1.pdf]

## Supporting Information

One-step hydrothermal synthesis of hydrophilic Fe<sub>3</sub>O<sub>4</sub>/carbon compositions and their application in removing toxic chemicals

Ming Chen,<sup>\*a</sup> Leng-Leng Shao,<sup>b</sup> Jia-Jia Li,<sup>a</sup> Wei-Jie Pei,<sup>a</sup> Meng-Ke Chen<sup>a</sup> and Xia-Hui Xie<sup>a</sup>

<sup>a</sup> *College of Chemistry and Chemical Engineering, Xinyang Normal University, Xinyang 464000, China.*

<sup>b</sup> *Grirem Advanced Materials Co., Ltd, General Research Institute for Nonferrous Metals, Beijing 100088, China*

\* Corresponding author. E-mail address: chenming19830618@126.com.

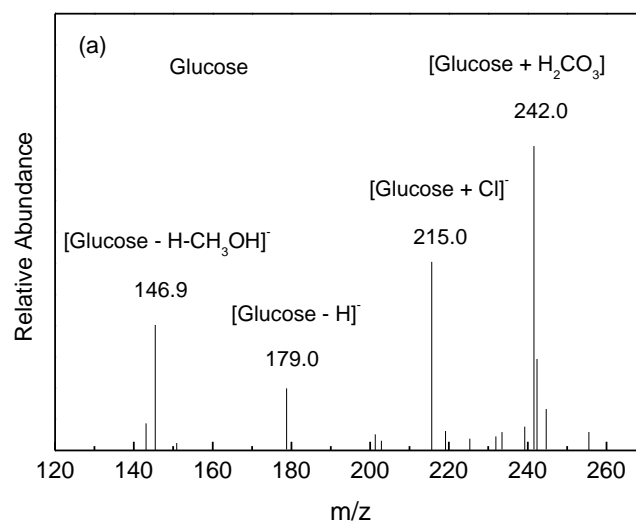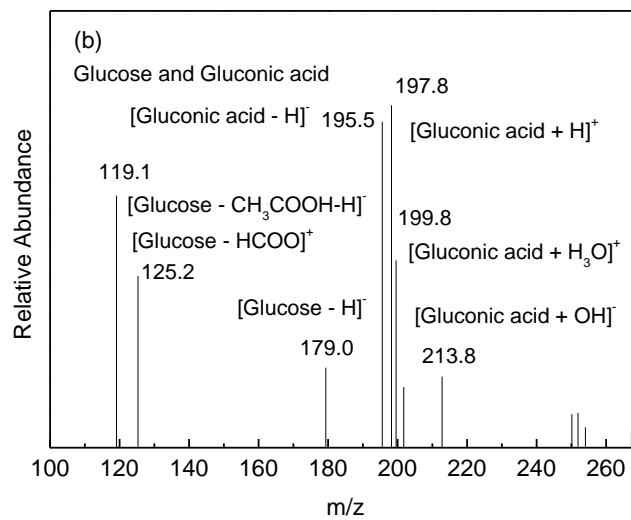

Figure S1. The mass spectrometry (MS) of raw glucose (a) and organic remainders (glucose and gluconic acid) of the reaction solution (b) for Fe<sub>3</sub>O<sub>4</sub>/C-b.

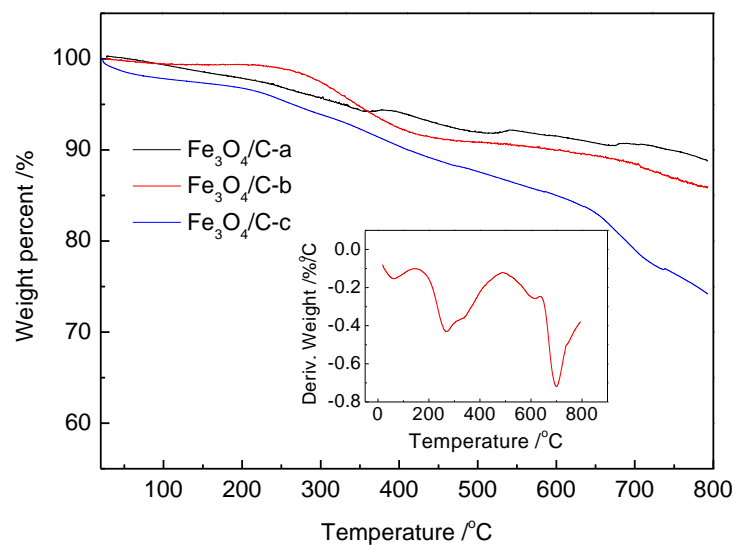

Figure S2. TGA curves of the synthesized magnetite nanoparticles Fe<sub>3</sub>O<sub>4</sub>/C-a, Fe<sub>3</sub>O<sub>4</sub>/C-b and Fe<sub>3</sub>O<sub>4</sub>/C-c (inset: the DTG curve of sample Fe<sub>3</sub>O<sub>4</sub>/C-b).

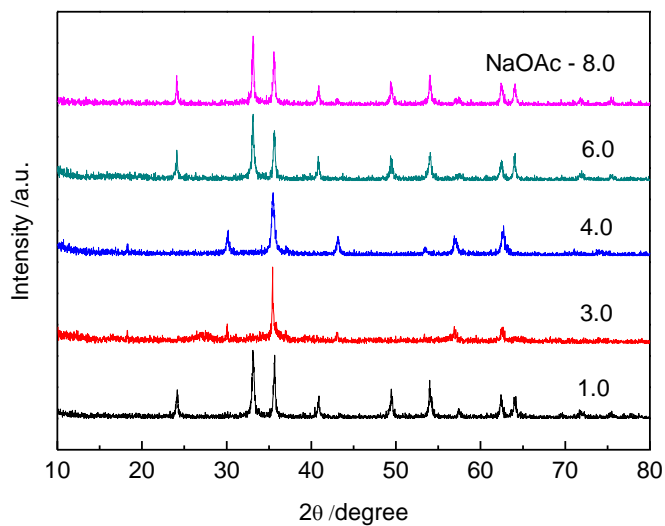

Figure S3. XRD patterns of iron oxide samples obtained by using different amount of NaOAc.

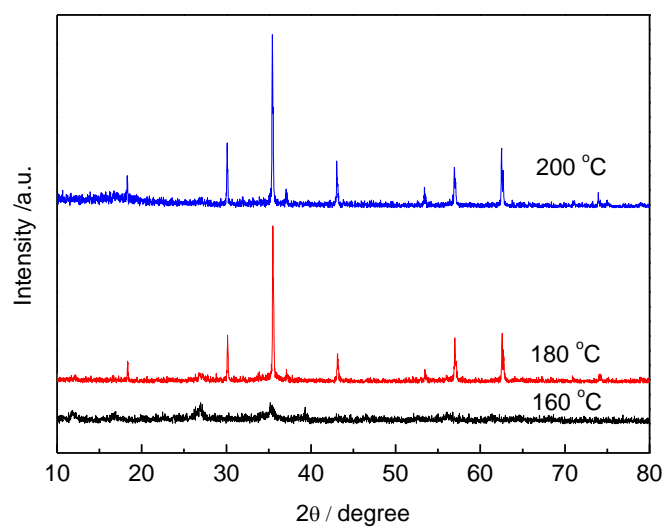

Figure S4. XRD patterns of iron oxide samples obtained by different hydrothermal reaction temperature.

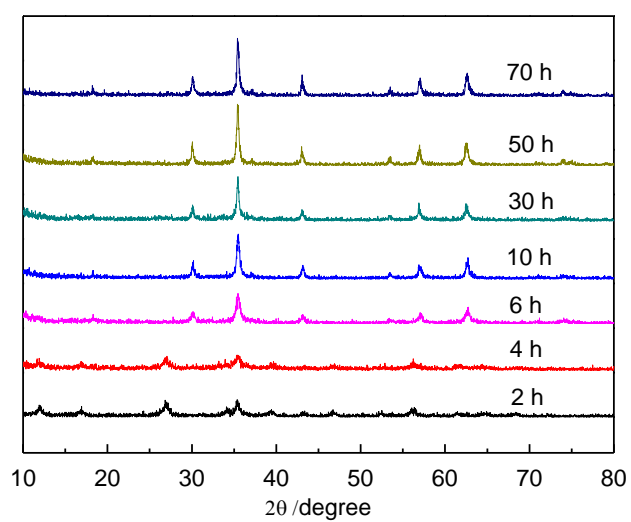

Figure S5. XRD patterns of iron oxide samples obtained by different reaction time.

Table S1. The factors influencing the formation of Fe<sub>3</sub>O<sub>4</sub>/C particles.

| Factors                                       | FeCl <sub>3</sub> /g | C <sub>6</sub> H <sub>12</sub> O <sub>6</sub> /g | NaOAc/g | T/°C | Crystallization time/h | product   |
|-----------------------------------------------|----------------------|--------------------------------------------------|---------|------|------------------------|-----------|
| C <sub>6</sub> H <sub>12</sub> O <sub>6</sub> | 1.6                  | 0.3                                              | 4       | 200  | 10                     | magnetite |
|                                               | 1.6                  | 0.6                                              | 4       | 200  | 10                     | magnetite |
|                                               | 1.6                  | 1.1                                              | 4       | 200  | 10                     | magnetite |
| NaOAc                                         | 1.6                  | 0.6                                              | 1       | 200  | 10                     | hematite  |
|                                               | 1.6                  | 0.6                                              | 3       | 200  | 10                     | magnetite |
|                                               | 1.6                  | 0.6                                              | 4       | 200  | 10                     | magnetite |
|                                               | 1.6                  | 0.6                                              | 6       | 200  | 10                     | hematite  |
|                                               | 1.6                  | 0.6                                              | 8       | 200  | 10                     | hematite  |
| Temperature                                   | 1.6                  | 0.6                                              | 4       | 160  | 10                     | hematite  |
|                                               | 1.6                  | 0.6                                              | 4       | 180  | 10                     | magnetite |
|                                               | 1.6                  | 0.6                                              | 4       | 200  | 10                     | magnetite |
| Crystallization time                          | 1.6                  | 0.6                                              | 4       | 200  | 2                      | hematite  |
|                                               | 1.6                  | 0.6                                              | 4       | 200  | 4                      | hematite  |
|                                               | 1.6                  | 0.6                                              | 4       | 200  | 6                      | magnetite |
|                                               | 1.6                  | 0.6                                              | 4       | 200  | 10                     | magnetite |
|                                               | 1.6                  | 0.6                                              | 4       | 200  | 30                     | magnetite |
|                                               | 1.6                  | 0.6                                              | 4       | 200  | 50                     | magnetite |
|                                               | 1.6                  | 0.6                                              | 4       | 200  | 70                     | magnetite |

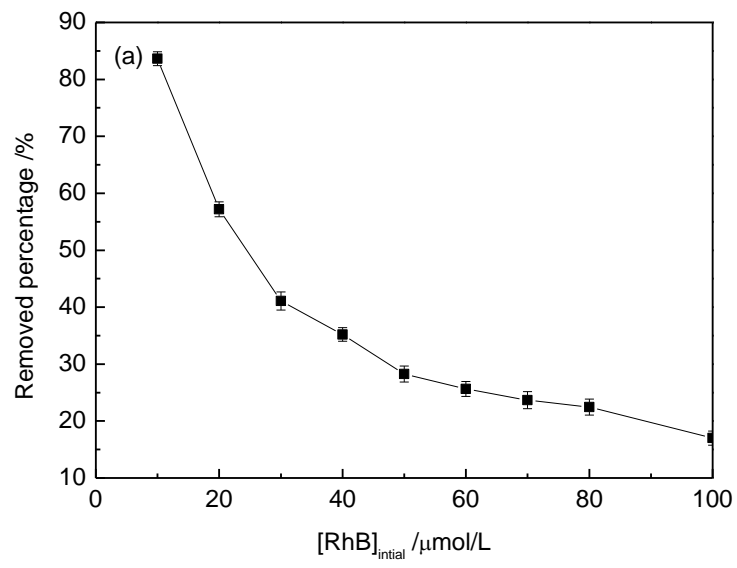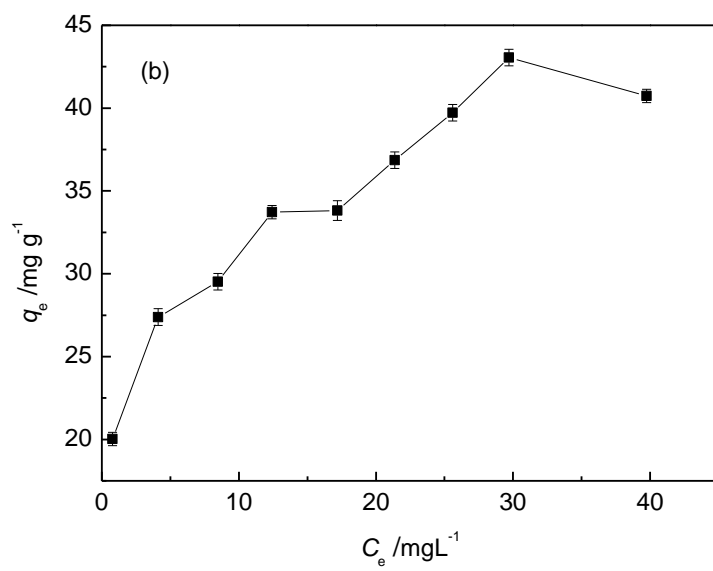

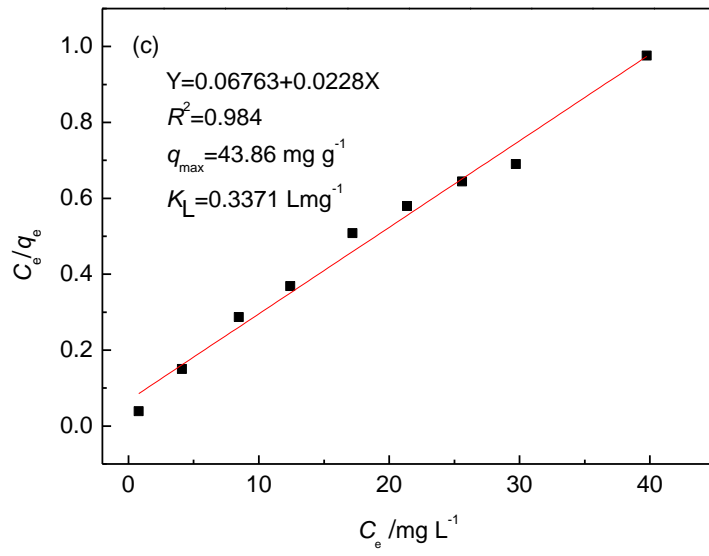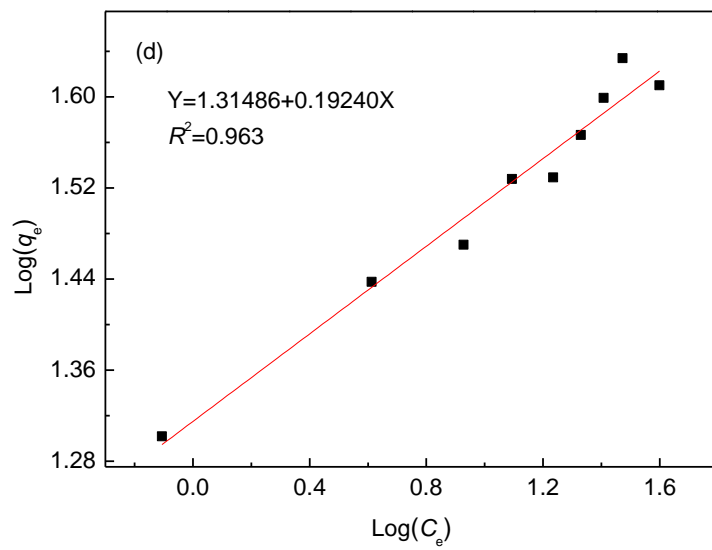

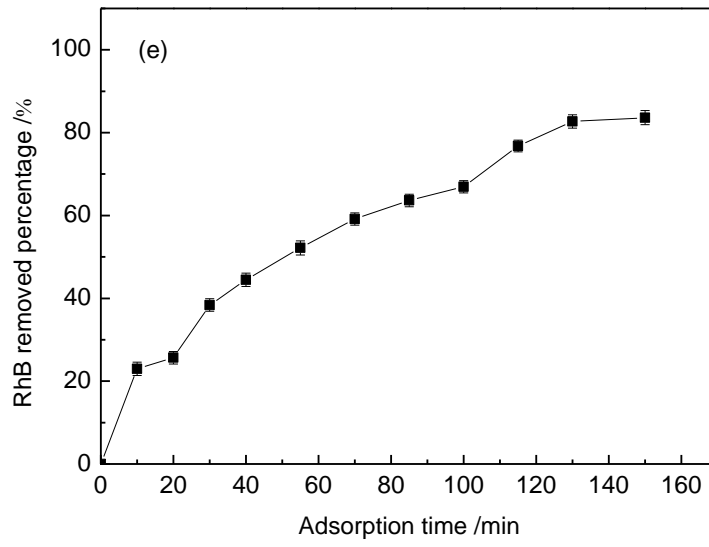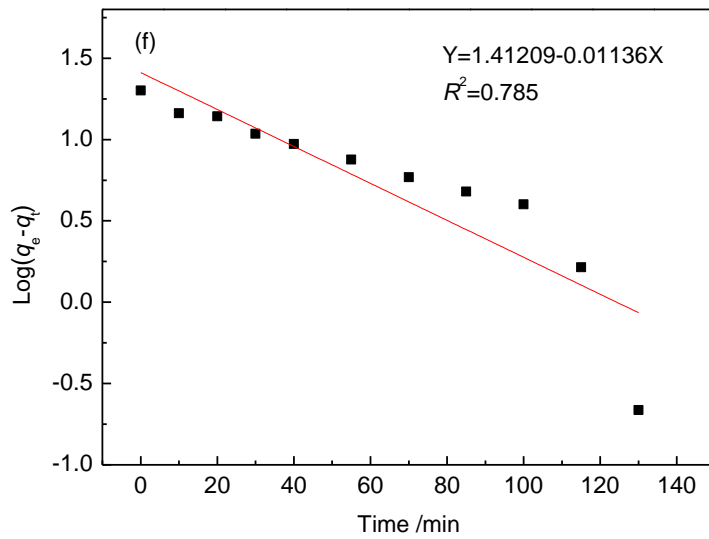



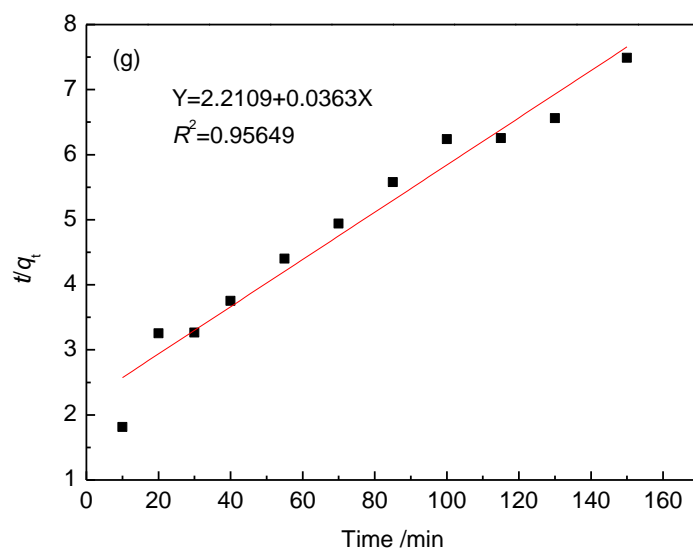

Figure S6. The removed percentage of RhB by as-prepared  $\text{Fe}_3\text{O}_4/\text{C-b}$  as a function of the initial concentration (a), the adsorption isotherm for  $\text{Fe}_3\text{O}_4/\text{C-b}$  adsorbent (b), the Langmuir (c) and Freundlich (d) isotherms for the adsorption of RhB, the effects of adsorption time for the RhB on the  $\text{Fe}_3\text{O}_4/\text{C-b}$  (e), the pseudo-first order adsorption rate equation (f) and the pseudo-second order adsorption rate equation (g).
